RESEARCH ARTICLE

# Deltamethrin-Mediated Toxicity and Cytomorphological Changes in the Midgut and Nervous System of the Mayfly *Callibaetis radiatus*

Yeisson Gutiérrez<sup>1</sup>, Helen P. Santos<sup>2</sup>, José Eduardo Serrão<sup>2</sup>, Eugênio E. Oliveira<sup>1\*</sup>

**1** Departamento de Entomologia, Universidade Federal de Viçosa, Viçosa, MG 36570–000, Brasil, **2** Departamento de Biologia Geral, Universidade Federal de Viçosa, Viçosa, MG 36570–000, Brasil

\* [eugenio@ufv.br](mailto:eugenio@ufv.br)

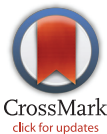

**OPEN ACCESS**

**Citation:** Gutiérrez Y, Santos HP, Serrão JE, Oliveira EE (2016) Deltamethrin-Mediated Toxicity and Cytomorphological Changes in the Midgut and Nervous System of the Mayfly *Callibaetis radiatus*. PLoS ONE 11(3): e0152383. doi:10.1371/journal.pone.0152383

**Editor:** Silvana Allodi, Federal University of Rio de Janeiro, BRAZIL

**Received:** December 14, 2015

**Accepted:** March 14, 2016

**Published:** March 31, 2016

**Copyright:** © 2016 Gutiérrez et al. This is an open access article distributed under the terms of the [Creative Commons Attribution License](https://creativecommons.org/licenses/by/4.0/), which permits unrestricted use, distribution, and reproduction in any medium, provided the original author and source are credited.

**Data Availability Statement:** All relevant data are within the paper and its Supporting Information files.

**Funding:** This work was supported by grants to all co-authors from the Minas Gerais State Foundation for Research Aid (FAPEMIG) and the CAPES Foundation; grants from Arthur Bernardes Foundation (FUNARBE) to EEO and from National Council of Scientific and Technological Development (CNPq) for YG (PEC-PG).

**Competing Interests:** The authors have declared that no competing interests exist.

## Abstract

Immature instars of mayflies are important constituents of the food web in aquatic ecosystems (especially in Neotropical regions) and they are among the most susceptible arthropods to pyrethroid insecticides. These insecticides have been recognized as important stressors of freshwater ecosystems, but their cellular effects in aquatic insects have been neglected. Here, we assessed the susceptibility to deltamethrin (a typical type II pyrethroid) as well as the deltamethrin-mediated cytomorphological changes in the central nervous system and midgut of the mayfly *Callibaetis radiatus*. While the deltamethrin LC<sub>50</sub> for 24h of exposure was of 0.60 (0.46–0.78) µg of a.i./L, the survival of *C. radiatus* was significantly reduced in deltamethrin concentrations ≥ 0.25 µg a.i./L at 96h of exposure. Sub-lethal deltamethrin exposure severely affected the cytomorphology of *C. radiatus* midgut (e.g., muscle layer retraction, cytoplasm vacuolation, nucleus and striated border disorganization) and also induced slight cytomorphological changes in the brain (e.g., presence of pyknotic nuclei) and in the thoracic ganglia (e.g., vacuolation of neurons and presence of pyknotic nuclei) of these insects. However, DNA damage was absent in all of these organs, suggesting that the sublethal cellular stress induced by deltamethrin might disrupt physiological processes (e.g., metabolism or electrical signal transmission) rather than cause cell death (e.g., apoptosis) in *C. radiatus*. Thus, our findings indicated that deltamethrin actions at cellular levels represent a clear indication of sublethal effects on the *C. radiatus* survival abilities.

## Introduction

The extensive use of pyrethroid insecticides in the control of virtually all agriculturally and medically important arthropod pests has raised concerns about its environmental safety, including their potential for serious harm in aquatic invertebrates [1–5]. The entry of this insecticide into aquatic ecosystems can occur *via* direct applications in water surfaces [6,7] or as a result of agricultural use, including spray drift, runoff and drainage [8–10].

Compared to organochlorine and other long-lasting compounds, insecticides such as the type II pyrethroid deltamethrin are rapidly broken down in sunlight [11,12]. However, such rapid sunlight-induced deltamethrin degradation has not affected its occurrence in water and sediments of aquatic ecosystems [13–16], increasing the possibility of deltamethrin intoxication for benthic organisms [16].

The main pyrethroid effects on insects are related to the physiological impairment of the voltage-gated sodium channels that are responsible for the initiation and propagation of action potentials in excitable cells [17–19]. This insecticide prolongs the opening of sodium channels, resulting in membrane depolarization leading to conductance block in the nervous system [20,21]. Other auxiliary targets, especially voltage-gated calcium and chloride channels, have been implicated in the actions of a subset of pyrethroids [19,22,23]. Furthermore, pyrethroid has been suggested to disrupt ion transport processes at epithelial tissues on aquatic and terrestrial insects [24–26].

Although mayfly species have become important model organisms in insecticide ecotoxicology [3,27–31], the insecticide-mediated cytomorphological changes in their central nervous system (the proposed target of the pyrethroids) and midgut (tissue of deltamethrin secondary actions) have been neglected. To address these knowledge gaps, we assessed the acute and chronic toxicity for deltamethrin in nymphs of the mayfly *Callibaetis radiatus* (Ephemeroptera: Baetidae). These ephemeropterans are well distributed in lentic environments of Neotropical regions [32], but have not been tested for pesticide susceptibilities. Furthermore, considering the fact that *Callibaetis* spp. nymphs are an important part of the food web in aquatic ecosystems [33] and other mayflies (e.g. Baetidae) have been used as biological indicator of environmental degradation [34], the findings of this study provide new insights that will assist in biomonitoring the influence of pesticides on benthic macroinvertebrate assemblages.

## Material and Methods

All applicable international, national, and institutional guidelines for the care and use of animals were considered in the present investigation.

### Test organism

Nymphs of *C. radiatus* (Fig 1) of 7–8 mm size (body length excluding the terminal filaments) were collected with D-net in pesticides-free artificial lakes at the fish-farming station of the Federal University of Viçosa (Viçosa, Minas Gerais State, Brazil). These nymphs were transferred to a laboratory and maintained at  $25 \pm 2^\circ\text{C}$ ,  $70 \pm 5\%$  relative humidity and 12 h photophase for 24 h before use in the experiments.

### Concentration-mortality bioassays

Groups of *C. radiatus* nymphs were exposed to a commercial formulation of deltamethrin (Decis 25EC®, Bayer CropScience Ltda., São Paulo, Brazil) at concentrations that ranged from 0.25 to 5 µg of a.i./L. These deltamethrin concentrations were selected after preliminary tests with a broad concentration range allowing the selection of lower (the highest deltamethrin concentration unable to kill *C. radiatus*) and upper (the smallest deltamethrin concentration able to kill 100% of *C. radiatus*) mortality responses. In the control treatment, only dechlorinated tap water was used. The exposure time was 24 h and individuals were considered to be dead when no movement of their appendages (legs, antennae, and terminal filaments) or gills was observed after repeated gentle mechanical stimulation with a pipette tip. Thus, the experimental unit consisted of groups of 10 nymphs that were submitted to 0.3 L of solution confined in

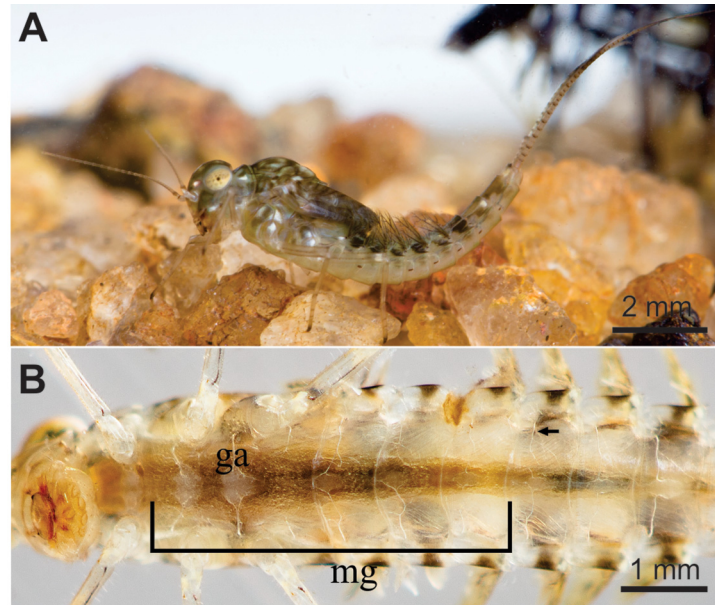

**Fig 1. Nymph of *C. radiatus*.** (A). Lateral view (B) Ventral view. **ga**: ganglion, **mg**: midgut; **arrow**: trachea.

doi:10.1371/journal.pone.0152383.g001

0.5 L glass vials (Laborquimi Vidrolabor, São Paulo, Brazil). Five replicates were used for each insecticide concentration.

## Histology

To detect sublethal effects of deltamethrin exposure, groups of 10 *C. radiatus* nymphs were exposed to the lower deltamethrin concentration (0.25 µg of a.i./L) and individuals who survived the exposure time for 1, 12 and 24 h were randomly selected to cytomorphological analysis. The control treatment (i.e., without insecticide application) consisted of exposure to dechlorinated tap water. The nymph size and insecticide exposure procedures were similar to the procedures described above. After exposure to deltamethrin, five nymphs of *C. radiatus* for each exposure time (1, 12 and 24 h) were dissected (Fig 1B) in the presence of insect saline solution (0.13 M NaCl; 0.01 M; Na<sub>2</sub>HPO<sub>4</sub> 0.02 M; KH<sub>2</sub>PO<sub>4</sub>; pH 7.2) and their midguts, brains and thoracic ganglia were transferred to Zamboni fixative solution [35] for 2 h. The samples were dehydrated in a graded ethanol series and embedded in JB4 Histo-resin (Electron Microscopy Sciences, Hatfield, PA, USA). Slices 2 µm thick were stained with hematoxylin and eosin and analyzed with a light microscope (Olympus BX53, Olympus Deutschland, Hamburg, Germany). Some midgut sections were submitted to the P.A.S histochemical tests to for detection of polysaccharides and neutral glucoconjugate [36]. Another set of midgut sections of the nymphs that were 24 h exposed to insecticide were submitted to the Feulgen reaction to evidence DNA [37].

## Apoptosis

**Immunofluorescence.** The midguts, brains and thoracic ganglia from five nymphs that were exposed to deltamethrin (0.25 µg of a.i./L) for 1, 12 and 24 h were dissected in 0.1 M sodium phosphate buffer (PBS) and transferred to Zamboni fixative solution for 15 min, followed by washing with PBS containing 1% Triton X-100 (PBST) and incubation with 1.5% bovine serum albumin in PBST for 15 min. Then, the samples were incubated with anti-

cleaved-caspase 3 antibody (Trevigen, Gaithersburg, MD, USA) at 1:500 in PBST for three days. After washing with PBST, the samples were incubated with anti-rabbit IgG FITC-conjugated antibody at 1:500 in PBST for two days in the dark, washed with PBST and the nucleus was stained with iodide propidium (5 mg/mL) for 5 min. The pieces were mounted with 50% sucrose and examined under a laser scanning confocal microscope (LSM510 META, Zeiss, Thornwood, NY, USA).

**DNA damage.** The total DNA was extracted from the midgut, brain and thoracic ganglia from three *C. radiatus* nymphs for each insecticide exposure time. The organs were dissected in 0.1 M PBS, homogenized in liquid nitrogen and incubated in the DNA extraction buffer (100 mM Tris-HCl; 25 mM EDTA; 100 mM NaCl; 1% SDS; pH 8.0). The DNA extracts were incubated in 6  $\mu$ L of proteinase K for 1 h at 60°C for protein degradation. Then, the samples were incubated in ice for 5 min. A phenol/chloroform/ethanol solution (25:24:1) was added, and the samples were centrifuged at 12,000  $\times$  g for 10 min. The supernatant was collected and mixed with 10  $\mu$ L of 3 M sodium acetate and 20  $\mu$ L of ethanol. The DNA was stored at -20°C for 24 h, centrifuged at 12,000  $\times$  g for 10 min and the pellet washed with 70% ethanol. Finally, the DNA was resuspended in 50  $\mu$ L of TE buffer (10 mM Tris-HCl; 1 mM EDTA), submitted to electrophoresis in 0.8% agarose gel and stained with GelRed™ (Biotium, Hayward, CA, USA)

## Survival bioassays

Nymphs of *C. radiatus* were exposed to four deltamethrin concentrations (0.25, 0.5, 2.5 and 5  $\mu$ g of a.i/L) determined by the concentration-mortality bioassay or to dechlorinated tap water (control). All the exposure procedures and insect sizes followed the same procedures described above for the concentration-mortality bioassays. The glass vials were covered with organza net to prevent losses of the emerged adults. The number of dead nymphs and emerged adults was recorded every six hours during 4 days (96 h). The dead individuals were removed from the vials as soon as they were registered in order to prevent cannibalism.

## Statistical analysis

Concentration-mortality curves were estimated by probit analyses using the PROC PROBIT procedure [38]. The results of the survival bioassays were subjected to survival analysis using the Kaplan-Meier estimator (Log-rank method) with the SigmaPlot 12.0 software (Systat Software, San Jose, California, USA). The nymphs surviving until the end of the experiment, as well as the emerged adults, were treated as censored data.

## Results

### Concentration-mortality and survival bioassays

The probit model was suitable for the concentration-mortality results with  $\chi^2 < 3.0$  and  $P > 0.05$ . Deltamethrin lethal concentrations (LC<sub>20</sub>, LC<sub>50</sub>, LC<sub>80</sub> and LC<sub>99</sub>) are shown in [Table 1](#).

**Table 1. Toxicity of deltamethrin to the mayfly *C. radiatus* (n = 270,  $\chi^2 = 2.10$ , P = 0.35).** Lethal concentration (LC) values were estimated based on concentration-mortality bioassays using probit analyses. CI denotes confidence interval. Concentrations are expressed in  $\mu$ g of a.i/L.

| Slope $\pm$ SE  | LC <sub>20</sub> (95% CI) | LC <sub>50</sub> (95% CI) | LC <sub>80</sub> (95% CI) | LC <sub>99</sub> (95% CI) |
|-----------------|---------------------------|---------------------------|---------------------------|---------------------------|
| 2.03 $\pm$ 0.28 | 0.23 (0.15–0.32)          | 0.60 (0.46–0.78)          | 1.56 (1.13–2.25)          | 3.89 (2.43–8.47)          |

doi:10.1371/journal.pone.0152383.t001

## Histology

**Midgut.** The midgut of *C. radiatus* nymphs not exposed to deltamethrin showed a single-layered epithelium of columnar digestive cells and some scattered nests of regenerative cells (Fig 2A–2C). The digestive cells showed spherical nuclei with some clots of condensed chromatin (Fig 2A–2C). The apical region of the digestive cells had a well-developed brush border near the peritrophic membrane (Fig 2B) lining the gut content. A well-developed circular muscle layer was found externally to the midgut epithelium (Fig 2B and 2C).

The cytomorphological changes in the midgut were affected by deltamethrin exposure time. The nymphs that survived 1 h of deltamethrin exposure showed columnar digestive cells with higher vacuolization of the basal cytoplasm, brush border and peritrophic membrane weakly acidophilus (Fig 2D–2F). Furthermore, the columnar digestive cell nucleus showed a decrease in the amount of condensed chromatin (Fig 2F). These cytomorphological changes persisted in the survivors of 12 h exposure to deltamethrin and vacuoles with strongly acidophilus content were observed (Fig 2G–2I).

After 24 h of deltamethrin exposure, the cytoplasm of the digestive cells showed decreased vacuolation, the presence of acidophilus vacuoles distributed throughout the cytoplasm and basophilic granules at the apical portion (Fig 2J–2L). The digestive cells re-organized into a columnar epithelium; their nucleus showed a higher amount of condensed chromatin and the cell apex was close to the peritrophic membrane (Fig 2L), whereas the muscle layer was separated from the epithelium (Fig 2K). The peritrophic membrane, brush border and some cytoplasmic granules of digestive cells of *C. radiatus* were P.A.S. positive (Fig 2C, 2F, 2I and 2L). Nymphs exposed to deltamethrin for 1 h and 12 h showed a decrease in the amount of P.A.S. positive cytoplasmic granules (Fig 2F and 2I), whereas in those nymphs exposed to deltamethrin for 24 h had P.A.S. positive microgranules in the apical region of the digestive cells (Fig 2L). Some basophilic granules were found in the cytoplasm of digestive cells in 24 h deltamethrin-exposed nymphs (Fig 2K), but these granules were Feulgen negative indicating that they were not nucleus fragments (S1 Fig).

**Brain and thoracic ganglia.** The brain of *C. radiatus* consisted of well-defined regions, showing neuronal cell bodies in the periphery and condensed neuropiles in the central region of the brain (Fig 3A). The protocerebrum, deutocerebrum and tritocerebrum were evident and the presence of several pyknotic nuclei was the only difference found in the brains of *C. radiatus* exposed to deltamethrin (Fig 3A–3E). Significant morphological changes were not found in the thoracic ganglia of unexposed and 1 h deltamethrin-exposed *C. radiatus* nymphs (Fig 4A, 4B, 4E and 4F). However, vacuolation in the neuronal cell bodies was observed after 12 h of deltamethrin exposure, which increase after 24 h of deltamethrin exposure (Fig 4C, 4D, 4G and 4H).

## Apoptosis

**Immunofluorescence and DNA fragmentation.** In the midgut of unexposed and 1 h deltamethrin-exposed *C. radiatus* nymphs, a few cleaved caspase-3 positive digestive cells were randomly distributed (Fig 5A and 5B). Increases in the number of cleaved caspase-3 positive cells were found in only a few regions of the midgut of *C. radiatus* nymphs that were 12 h or 24 h deltamethrin-exposed (Fig 5G and 5J).

In the thoracic ganglia of the nymphs that were deltamethrin-exposed for 12 and 24 h, few regions showed nerve cells with a higher cleaved caspase-3 positive reaction (Fig 5H and 5K). In the brain, no cleaved caspase-3 neurons were found for deltamethrin unexposed nymphs, whereas deltamethrin-exposed nymphs showed some cleaved caspase-3 positive neurons, but this was independent of the duration of deltamethrin exposure (Fig 5C, 5F, 5I and 5L). DNA

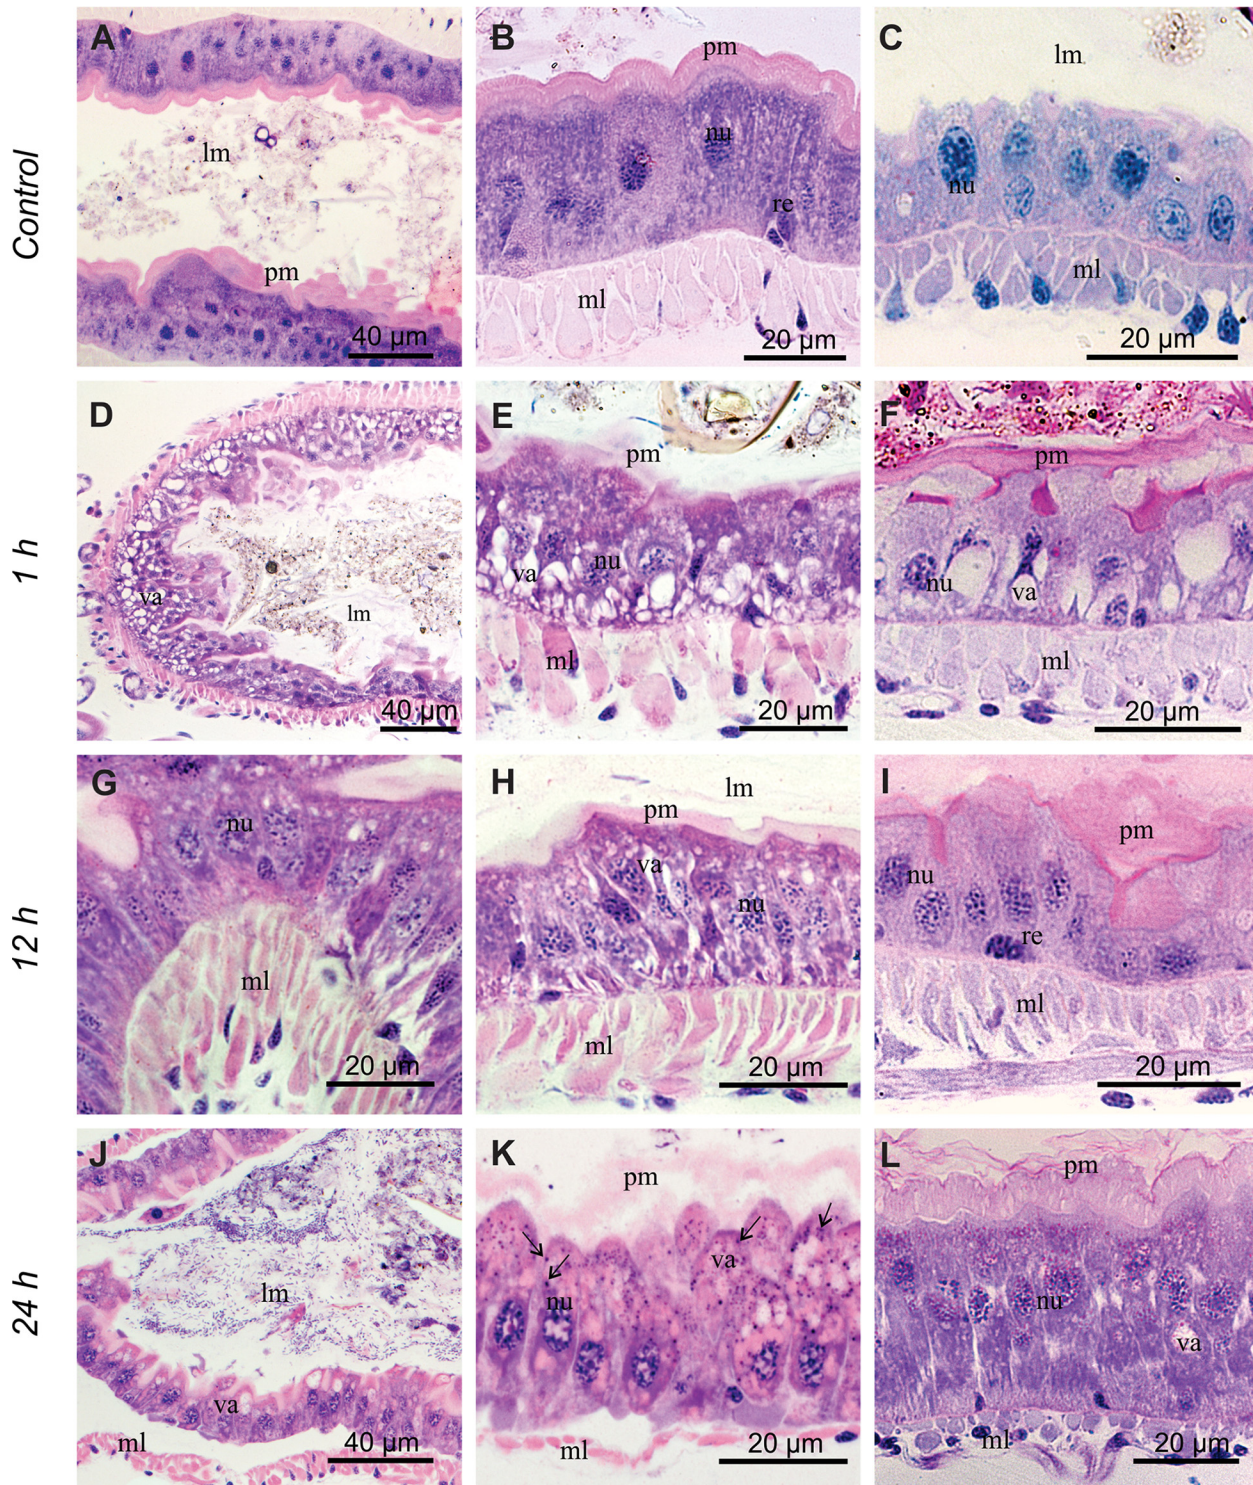

**Fig 2. Histological sections of *C. radiatus* midgut stained with hematoxylin and eosin. (A-C):** control treatment with no exposure to insecticide. **(D-F):** 1h exposure to deltamethrin. **(G-I):** 12 h exposure to deltamethrin. **(J-L):** 24 h exposure to deltamethrin. All exposure time were performed for the lowest deltamethrin concentration (0.25  $\mu\text{g}$  of a.i/L) used in this study. **lm:** midgut lumen, **pm:** peritrophic membrane, **nu:** nuclei, **ml:** muscle layer, **va:** vacuolation, **arrows:** basophilic granules.

doi:10.1371/journal.pone.0152383.g002

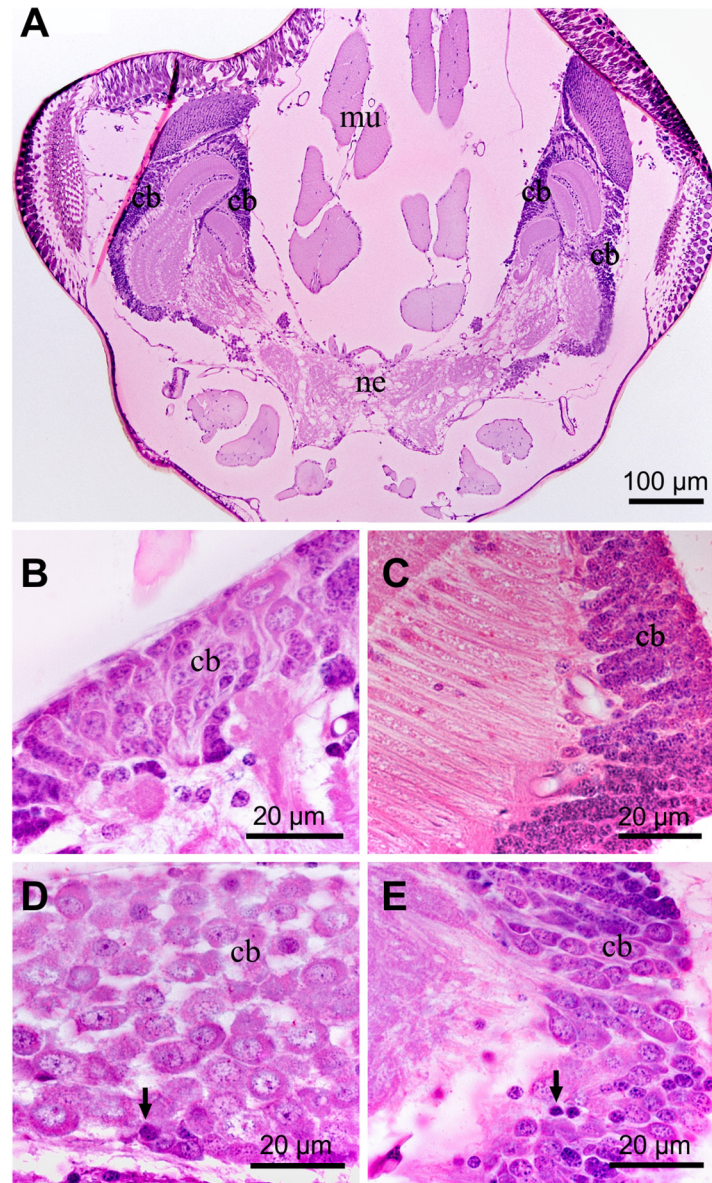

**Fig 3. Histological sections of *C. radiatus* brain stained with hematoxylin and eosin. (A)**, Whole brain section. **(B)**, Control treatment with no exposure to insecticide. **(C)**, 1 h exposure to deltamethrin. **(D)**, 12 h exposure to deltamethrin. **(E)**, 24 h exposure to deltamethrin. All exposure times were performed for the lowest deltamethrin concentration used in this study (0.25  $\mu\text{g}$  of a.i./L). **ne**: neuropile; **cb**: cell body of neuron; **arrow**: pyknotic nucleus; **mu**: muscles.

doi:10.1371/journal.pone.0152383.g003

fragmentation was completely absent in the analysis of DNA integrity from the midgut, thoracic ganglia and brain of nymphs exposed to all time treatments, (S2 Fig).

### Survival Analysis

The survival analysis of the data from *C. radiatus* nymphs exposed to deltamethrin residues indicated significant differences among the insecticide concentrations (Log-rank test,  $\chi^2 = 204.7$ ,  $df = 4$ ,  $P < 0.001$ ). After four days of exposure, survival was above 60% for nymphs

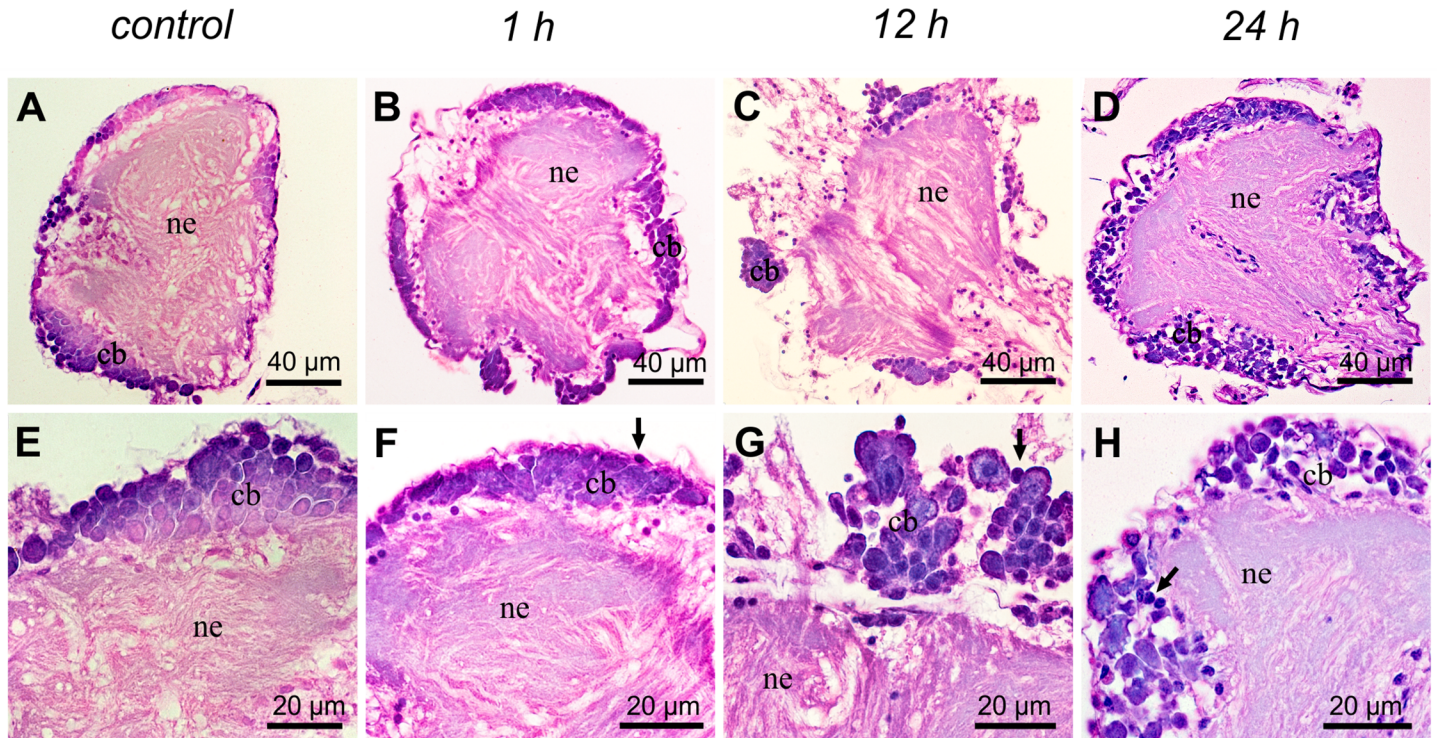

**Fig 4. Histological sections of *C. radiatus* thoracic ganglia stained with hematoxylin and eosin. (A and E), Control treatment with no exposure to insecticide. (B and F), 1 h exposure to deltamethrin. (C and G), 12 h exposure to deltamethrin. (D and H), 24 h exposure to deltamethrin. All exposure time were performed for the lowest deltamethrin concentration used in this study (0.25 µg of a.i/L). ne: neuropile; cb: cell body of neuron; arrow: pyknotic nucleus**

doi:10.1371/journal.pone.0152383.g004

that had not been exposed to deltamethrin, decreasing to approximately 30% at the lowest deltamethrin concentration (0.25 µg of a.i/L) and dropping to less than 6% at the deltamethrin concentration of 0.5 µg of a.i/L (Fig 6A). Deltamethrin concentration higher than 0.5 µg of a.i/L resulted in 100% mortality of nymphs for exposure times <48 h (Fig 6B).

## Discussion

The immature instars of benthic mayflies are among the most sensitive arthropods to pyrethroid insecticides [27,29]. Here, we assessed deltamethrin toxicity to *C. radiatus* nymphs (including the effects on their survival abilities) and evaluated the deltamethrin-mediated changes in the digestive and central nervous system of these insects. The nymphs of *C. radiatus* were highly susceptible to deltamethrin (LC<sub>50</sub> = 0.60 [0.46–0.78] µg/L), reducing their survival abilities when exposed to deltamethrin concentration as low as 0.25 µg/L. Short-term (up to 24 h and at 0.25 µg/L) exposure to deltamethrin did not induce cell death in the midgut and central nervous system but affected their cytomorphology, suggesting potential disturbances in the physiological processes (e.g., metabolism or electrical signal transmission) of *C. radiatus* that might lead to survival deficits.

The cytomorphological alterations in the insect midgut caused by insecticides have been reported in different insect species [24,26,39–42]. Here, the degeneration of digestive cells (e.g., vacuolation, decreased acidophilia in the brush border and decreased amount of condensed chromatin in the cell nucleus) in the midgut of *C. radiatus* nymphs exposed for 1 h and 12 h to deltamethrin seems to be mitigated in the nymphs exposed for 24 h, which suggests that midgut cells undergo some detoxification processes, thereby reducing the deltamethrin effects. The



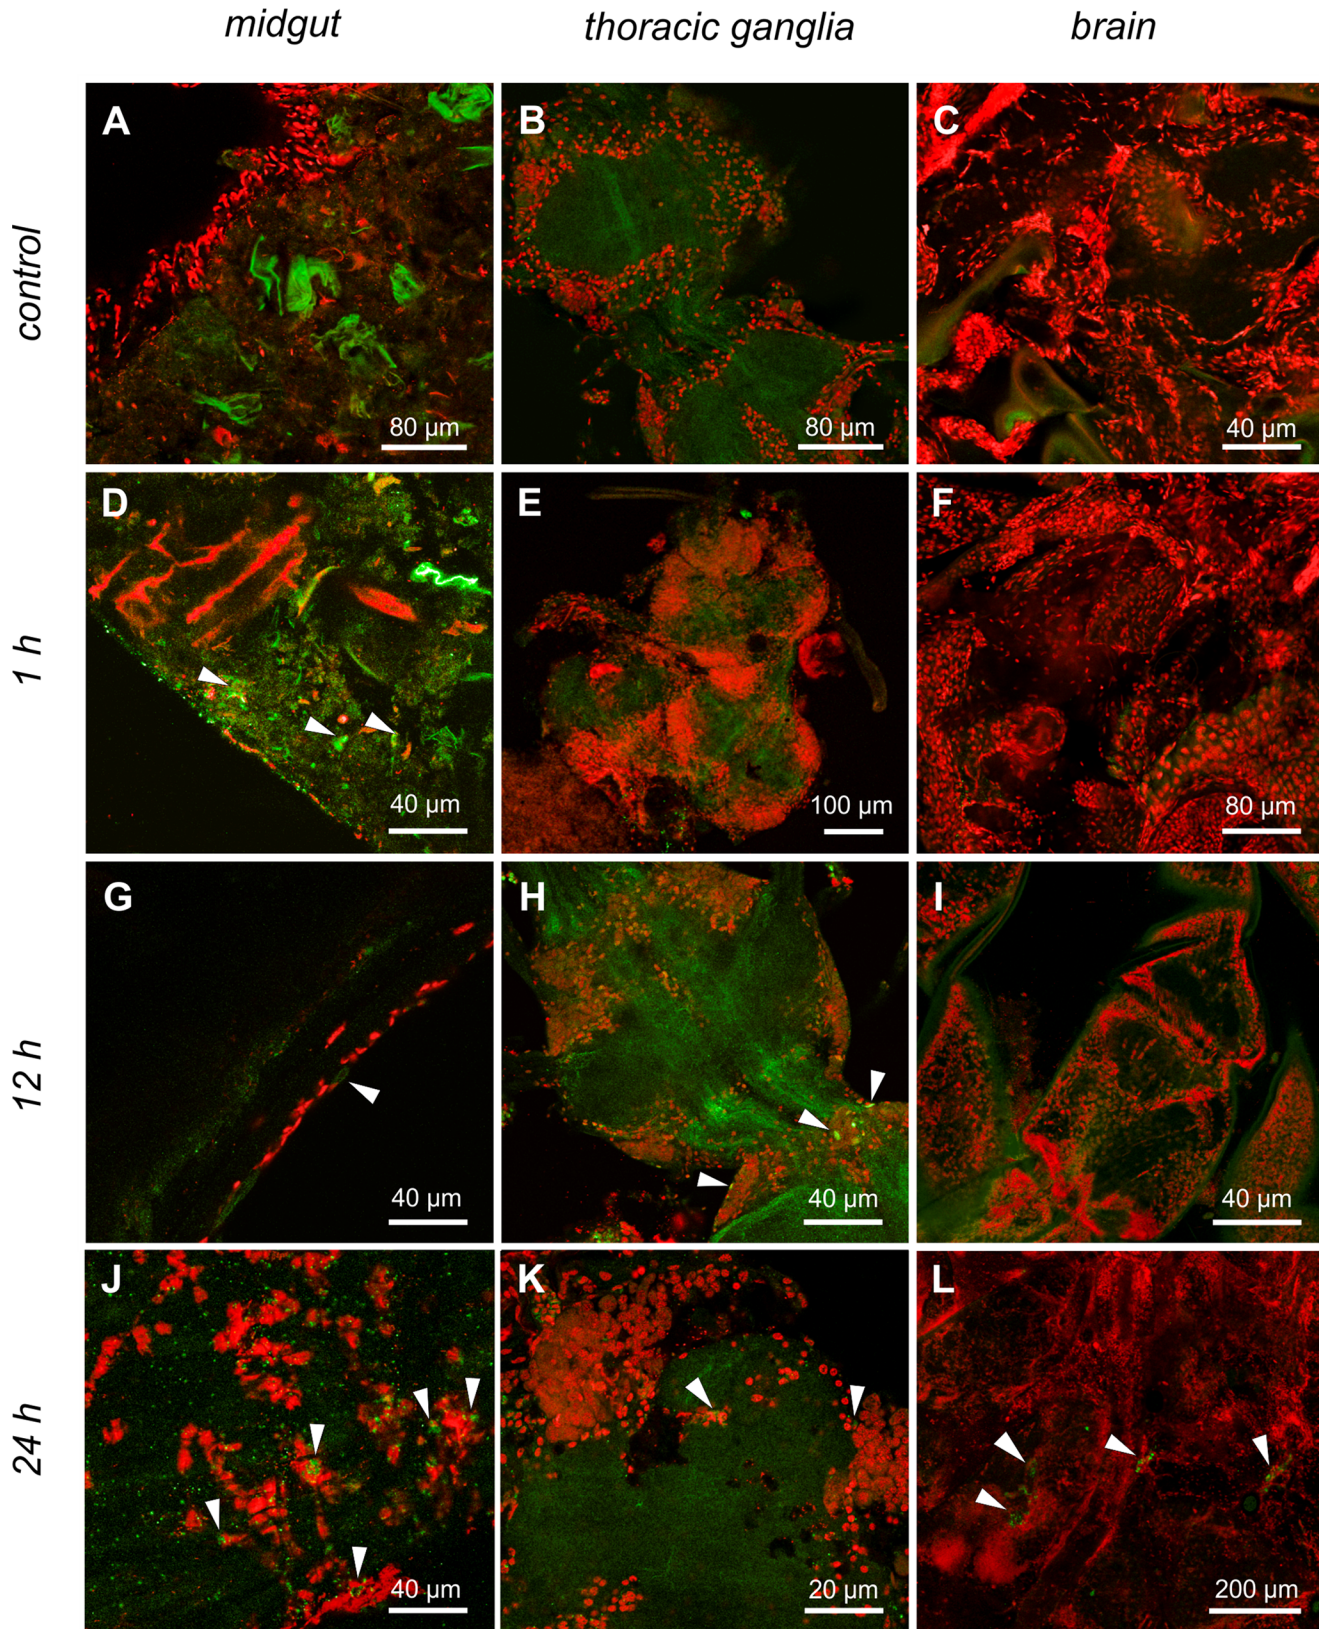

**Fig 5. Immunofluorescence of *C. radiatus* tissues using anti-cleaved-caspase-3 antibody (green).** (A, D, G and J), midgut control, 1, 12, 24 h treatments correspondingly. (B, E, H and K), thoracic ganglia control, 1, 12, 24 h treatments correspondingly. (C, F, I and L), brain control, 1, 12, 24 h treatments correspondingly. Arrowheads indicate caspase-3 activity.

doi:10.1371/journal.pone.0152383.g005

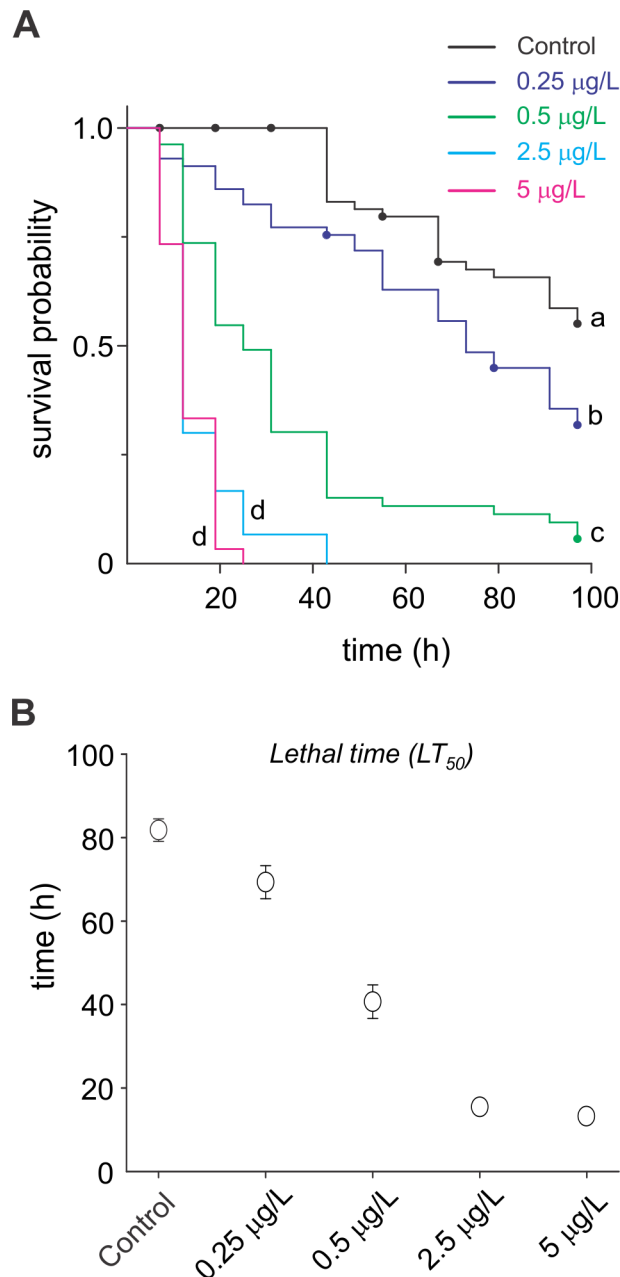

**Fig 6. Deltamethrin-mediated changes in the survival abilities of *C. radiatus*.** (A) Survival curves of *C. radiatus* nymphs subjected to up to 96 h deltamethrin exposure. Only the survival curves of the highest concentrations (2.5 and 5 µg of a.i/L) were not significantly different by Holm-Sidak's test ( $P > 0.05$ ). Points represent the censored data (nymphs surviving until the end of the experiment, as well as the emerged adults). (B) Mean lifetime of *C. radiatus* nymphs under 96 h deltamethrin exposure. Dispersion expressed as SE.

doi:10.1371/journal.pone.0152383.g006

occurrence of detoxification processes in the insect midgut is not unexpected since the primary functions of the midgut include digestive enzyme production and nutrient absorption of digestion products [42–45]. In this sense, larvae of the mosquito *Culex quinquefasciatus* showed higher vacuolization in the midgut cells after exposure to insecticides, including deltamethrin [24].

It is worth to note that *C. radiatus* might have an efficient midgut epithelium, because this layer was structured with digestive and regenerative cells, while other ephemeropterans only showed digestive cells [46]. The presence of some cytoplasm basophilic granules in the midgut cells of 24 h deltamethrin-exposed nymphs suggest a potential bioaccumulation of deltamethrin and its byproducts, as suggested elsewhere for other toxicants [47,48]. One might suggest that the basophilic granules are nucleus fragments commonly found in cells that undergo apoptosis, but we showed by the Feulgen reaction that these granules are not of nuclear origin.

In addition to the afore-mentioned changes, cytoplasm vacuolization in the midgut of *C. radiatus* might represent the initial processes of deltamethrin-mediated changes, which ultimately may result in autophagy [49–51], apocrine secretion and/or apoptosis [52–54]. However, the measurements of cleaved caspase-3 positive cells, which are extensively used as an indicator of apoptosis in animal cells [54–56], only slightly increased in the midgut of deltamethrin-exposed nymphs. These cleaved caspase-3 cell increases might indicate an early stage of the apoptosis process in the assessed organs, but it cannot be ruled out that this phenomenon may be part of the normal cell renewal in these organs [56,57]. This latter hypothesis is supported by the absence of DNA fragmentation in the organs of *C. radiatus* exposed to deltamethrin.

The brain and thoracic ganglia of *C. radiatus* nymphs show the usual morphology described for other ephemeropterans [58] with the brain presenting proto- deuto- and tritocerebrum regions and the thoracic ganglia, likely having a cortex region formed by the neuron cell bodies and the central region (neuropile) formed by the axon and dendrites. Although major pyrethroid actions occur on the axonal nerve impulse transmission [17–19], here we found only slight changes in the cytomorphology of the nerve cells in the brain and in the thoracic ganglia. On contrary, the synganglion of the *Rhipicephalus sanguineus* (Acari: Ixodidae) females showed strong structural and enzymatic changes after exposure to the pyrethroid permethrin [59]. Such differential susceptibility might reflect differences between the protection efficacy provided by the perineurium and glial cells in insects and mites, once this cell layers prevent or decrease the interaction of insecticide molecules with the neural environment [59–61].

The differences of severity and type of cytomorphological changes among the organs studied may result from the deltamethrin toxicological characteristics. Deltamethrin also causes secondary effects that contribute to its toxicity [19,62,63]. For instance, osmotic imbalances in the digestive tract may contribute to deltamethrin secondary actions, since the digestive tract is one of the main routes of absorption and accumulation in heterotrophic aquatic organisms [64,65]. Exposure to sublethal deltamethrin concentrations results in cytomorphological changes that may reduce the animal's ability to convert ingested food into the nutrients needed for their development and/or reproduction [65,66].

The survival of *C. radiatus* nymphs was reduced under longer exposure (up to 96 h) to a deltamethrin concentration that did not induce cell death up to 24 h of exposure. When exposed to sublethal concentrations of a pesticide, the basal metabolism of insects could increase in response to the physiological stress imposed by the pesticide [67], which might not affect the ability to survive a single insecticide pulse but will certainly increase the chance to make the insect less healthy [68]. For instance, the sublethal exposure of arthropods to deltamethrin have been showed to impair their gas exchange system, decreasing the oxygen uptake and dysregulation of the breathing activities [69]. Thus, our findings show that the cytomorphological

alterations found in the deltamethrin (0.25 µg a.i./L; 24 h exposure period)-exposed mayflies represent a clear indication of sublethal effects on the *C. radiatus* survival abilities, which might reduce the densities of *C. radiatus* populations and, consequently, disturbing the lentic macroinvertebrate assemblages where this insecticide is used (e.g. near agricultural and urban areas).

## Supporting Information

### S1 Data. Raw data used in the Probit analysis.

(PDF)

### S2 Data. Raw data used in the survival analysis.

(PDF)

### S1 Fig. Histological sections of *C. radiatus* midgut after 24 h exposure to deltamethrin stained with Feulgen technique. **lm**: midgut lumen, **nu**: nuclei, **ml**: muscle layer.

(PDF)

### S2 Fig. DNA integrity of the midgut (MG), thoracic ganglia (Gan) and brain (Brn) of *C. radiatus* for the unexposed (cont.) and the 1, 12, and 24 h exposure treatments. The first column corresponds to the standard (S).

(PDF)

## Acknowledgments

We thank Dr. Jorge A. Dergam for allowing the use of the microscope imaging facilities, Dr. Ana L. Salaro for providing free access to the fish-farming installations, Mr. Hemerson L. Freitas for his excellent technical assistance and the Center of Microscopy and Microanalyses from UFV for technical assistance.

## Author Contributions

Conceived and designed the experiments: EEO YG HPS JES. Performed the experiments: YG HPS. Analyzed the data: EEO JES. Contributed reagents/materials/analysis tools: EEO JES. Wrote the paper: EEO YG HPS JES.

## References

1. Schulz R, Liess M (2001) Acute and chronic effects of particle-associated fenvalerate on stream macroinvertebrates: a runoff simulation study using outdoor microcosms. *Arch Environ Contam Toxicol* 40: 481–488. PMID: [11525490](#)
2. Schulz R, Liess M (2001) Toxicity of aqueous-phase and suspended particle-associated fenvalerate: chronic effects after pulse-dosed exposure of *Limnephilus lunatus* (Trichoptera). *Environ Toxicol Chem* 20: 185–190. PMID: [11351407](#)
3. Beketov MA, Liess M (2005) Acute contamination with fenvalerate and food limitation: Chronic effects on the mayfly, *Cloeon dipterum*. *Environmental Toxicology and Chemistry* 24: 1281–1286. PMID: [16111012](#)
4. Beketov MA, Liess M (2008) Potential of 11 pesticides to initiate downstream drift of stream macroinvertebrates. *Arch Environ Contam Toxicol* 55: 247–253. doi: [10.1007/s00244-007-9104-3](#) PMID: [18180861](#)
5. Toumi H, Boumaiza M, Millet M, Radetski CM, Felten V, Fouque C, et al. (2013) Effects of deltamethrin (pyrethroid insecticide) on growth, reproduction, embryonic development and sex differentiation in two strains of *Daphnia magna* (Crustacea, Cladocera). *Science of The Total Environment* 458–460: 47–53. doi: [10.1016/j.scitotenv.2013.03.085](#) PMID: [23639911](#)
6. Rozilawati H, Lee HL, Mohd Masri S, Mohd Noor I, Rosman S (2005) Field bioefficacy of deltamethrin residual spraying against dengue vectors. *Trop Biomed* 22: 143–148. PMID: [16883280](#)

7. Bengoa M, Eritja R, Lucientes J (2014) Ground ultra-low volume adulticiding field trials using pyrethroids against *Aedes albopictus* in the Baix Llobregat region, Spain. *Journal of the American Mosquito Control Association* 30: 42–50. PMID: [24772676](#)
8. Schulz R (2001) Comparison of spray drift- and runoff-related input of azinphos-methyl and endosulfan from fruit orchards into the Lourens River, South Africa. *Chemosphere* 45: 543–551. PMID: [11680750](#)
9. Reichenberger S, Bach M, Skitschak A, Frede H-G (2007) Mitigation strategies to reduce pesticide inputs into ground- and surface water and their effectiveness; A review. *Science of The Total Environment* 384: 1–35. PMID: [17588646](#)
10. Bereswill R, Strelake M, Schulz R (2013) Current-use pesticides in stream water and suspended particles following runoff: Exposure, effects, and mitigation requirements. *Environmental Toxicology and Chemistry* 32: 1254–1263. doi: [10.1002/etc.2170](#) PMID: [23404692](#)
11. Wheelock CE, Miller JL, Miller MJ, Phillips BM, Gee SJ, Tjeerdema RS, et al. (2005) Influence of container adsorption upon observed pyrethroid toxicity to *Ceriodaphnia dubia* and *Hyalella azteca*. *Aquatic Toxicology* 74: 47–52. PMID: [15951033](#)
12. Lawler SP, Dritz DA, Johnson CS, Wolder M (2008) Does synergized pyrethrin applied over wetlands for mosquito control affect *Daphnia magna* zooplankton or *Callibaetis californicus* mayflies? *Pest Manag Sci* 64: 843–847. doi: [10.1002/ps.1575](#) PMID: [18366067](#)
13. Amweg EL, Weston DP, You J, Lydy MJ (2006) Pyrethroid insecticides and sediment toxicity in urban creeks from California and Tennessee. *Environ Sci Technol* 40: 1700–1706. PMID: [16568790](#)
14. Weston DP, Amweg EL, Mekebre A, Ogle RS, Lydy MJ (2006) Aquatic effects of aerial spraying for mosquito control over an urban area. *Environ Sci Technol* 40: 5817–5822. PMID: [17007146](#)
15. Feo ML, Ginebreda A, Eljarrat E, Barceló D (2010) Presence of pyrethroid pesticides in water and sediments of Ebro River Delta. *Journal of Hydrology* 393: 156–162.
16. Pawlisz AV, Busnarda J, McLauchlin A, Caux PY, Kent RA (1998) Canadian water quality guidelines for deltamethrin. *Environmental Toxicology and Water Quality* 13: 175–210.
17. Dong K (2007) Insect sodium channels and insecticide resistance. *Invertebrate Neuroscience* 7: 17–30. PMID: [17206406](#)
18. Silver KS, Du Y, Nomura Y, Oliveira EE, Salgado VL, Zhorov BS, et al. (2014) Voltage-gated sodium channels as insecticide targets. In: Ephraim C, editor. *Advances in Insect Physiology*: Academic Press. pp. 389–433.
19. Soderlund D (2012) Molecular mechanisms of pyrethroid insecticide neurotoxicity: recent advances. *Archives of Toxicology* 86: 165–181. doi: [10.1007/s00204-011-0726-x](#) PMID: [21710279](#)
20. Narahashi T (1988) Molecular and cellular approaches to neurotoxicology: past, present and future. In: *Neurotox '88: molecular basis of drug and pesticide action*; Lunt GG e, editor: New York: Elsevier. 563–582 p.
21. Narahashi T (2000) Neuroreceptors and ion channels as the basis for drug action: past, present, and future. *J Pharmacol Exp Ther* 294: 1–26. PMID: [10871290](#)
22. Burr SA, Ray DE (2004) Structure-activity and interaction effects of 14 different pyrethroids on voltage-gated chloride ion channels. *Toxicol Sci* 77: 341–346. PMID: [14657519](#)
23. Ray DE, Fry JR (2006) A reassessment of the neurotoxicity of pyrethroid insecticides. *Pharmacol Ther* 111: 174–193. PMID: [16324748](#)
24. Alves SN, Serrão JE, Melo AL (2010) Alterations in the fat body and midgut of *Culex quinquefasciatus* larvae following exposure to different insecticides. *Micron* 41: 592–597. doi: [10.1016/j.micron.2010.04.004](#) PMID: [20452779](#)
25. Konus M, Koy C, Mikkat S, Kreutzer M, Zimmermann R, Iscan M, et al. (2013) Molecular adaptations of *Helicoverpa armigera* midgut tissue under pyrethroid insecticide stress characterized by differential proteome analysis and enzyme activity assays. *Comparative Biochemistry and Physiology—Part D: Genomics and Proteomics* 8: 152–162. doi: [10.1016/j.cbd.2013.04.001](#) PMID: [23685472](#)
26. Fu K-Y, Guo W-C, Lü F-g, Liu X-p, Li G-Q (2014) Response of the vacuolar ATPase subunit E to RNA interference and four chemical pesticides in *Leptinotarsa decemlineata* (Say). *Pesticide Biochemistry and Physiology* 114: 16–23. doi: [10.1016/j.pestbp.2014.07.009](#) PMID: [25175645](#)
27. Beketov MA (2004) Comparative sensitivity to the insecticides deltamethrin and esfenvalerate of some aquatic insect larvae (Ephemeroptera and Odonata) and *Daphnia magna*. *Russian Journal of Ecology* 35: 200–204.
28. Licht O, Jungmann D, Ludwischowski K-U, Nagel R (2004) Long-term effects of fenoxycarb on two mayfly species in artificial indoor streams. *Ecotoxicology and Environmental Safety* 58: 246–255. PMID: [15157579](#)

29. Nørnum U, Friberg N, Jensen MR, Pedersen JM, Bjerregaard P (2010) Behavioural changes in three species of freshwater macroinvertebrates exposed to the pyrethroid lambda-cyhalothrin: laboratory and stream microcosm studies. *Aquat Toxicol* 98: 328–335. doi: [10.1016/j.aquatox.2010.03.004](https://doi.org/10.1016/j.aquatox.2010.03.004) PMID: [20362345](https://pubmed.ncbi.nlm.nih.gov/20362345/)
30. Roessink I, Merga LB, Zweers HJ, Van den Brink PJ (2013) The neonicotinoid imidacloprid shows high chronic toxicity to mayfly nymphs. *Environmental Toxicology and Chemistry* 32: 1096–1100. doi: [10.1002/etc.2201](https://doi.org/10.1002/etc.2201) PMID: [23444274](https://pubmed.ncbi.nlm.nih.gov/23444274/)
31. Van den Brink PJ, Van Smeden JM, Bekele RS, Dierick W, De Gelder DM, Noteboom M, et al. (2015) Acute and chronic toxicity of neonicotinoids to nymphs of a mayfly species and some notes on seasonal differences. *Environmental Toxicology and Chemistry*: n/a-n/a.
32. Cruz PV, Salles FF, Hamada N (2014) *Callibaetis Eaton* (Ephemeroptera: Baetidae) from Brazil. *Journal of Natural History* 48: 591–660.
33. Domínguez E, Molineri C, Pescador ML, Hubbard MD, Nieto C (2006) *Ephemeroptera of South America*. Sofia—Moscow: Pensoft Publishers.
34. Buss D, Salles F (2007) Using Baetidae species as biological indicators of environmental degradation in a Brazilian river basin. *Environmental Monitoring and Assessment* 130: 365–372. PMID: [17106778](https://pubmed.ncbi.nlm.nih.gov/17106778/)
35. Stefanini M, Martino CD, Zamboni L (1967) Fixation of ejaculated spermatozoa for electron microscopy. *Nature* 216: 173–174. PMID: [4862079](https://pubmed.ncbi.nlm.nih.gov/4862079/)
36. Pearse AGV (1985) *Histochemistry: Theoretical and Applied*. London: J & A Churchill.
37. Darlington CD, La Cour LF (1960) *The handling of chromosomes*. London: Allen & Unwin.
38. SAS Institute (2008) *SAS/STAT User's Guide*.; SAS, editor. Cary, NC, USA.
39. Li F, Hu J, Tian J, Xu K, Ni M, et al. (2016) Effects of phoxim on nutrient metabolism and insulin signaling pathway in silkworm midgut. *Chemosphere* 146: 478–485. doi: [10.1016/j.chemosphere.2015.12.032](https://doi.org/10.1016/j.chemosphere.2015.12.032) PMID: [26741554](https://pubmed.ncbi.nlm.nih.gov/26741554/)
40. Scudeler EL, Santos DC (2014) Side effects of neem oil on the midgut endocrine cells of the green lacewing *Ceraeochrysa claveri* (Navás) (Neuroptera: Chrysopidae). *Neotropical Entomology* 43: 154–160.
41. Scudeler EL, Santos DCd (2013) Effects of neem oil (*Azadirachta indica* A. Juss) on midgut cells of predatory larvae *Ceraeochrysa claveri* (Navás, 1911) (Neuroptera: Chrysopidae). *Micron* 44: 125–132. doi: [10.1016/j.micron.2012.05.009](https://doi.org/10.1016/j.micron.2012.05.009) PMID: [22739123](https://pubmed.ncbi.nlm.nih.gov/22739123/)
42. Xu Z-B, Zou X-P, Zhang N, Feng Q-L, Zheng S-C (2015) Detoxification of insecticides, allelochemicals and heavy metals by glutathione S-transferase SIGSTE1 in the gut of *Spodoptera litura*. *Insect Science* 22: 503–511. doi: [10.1111/1744-7917.12142](https://doi.org/10.1111/1744-7917.12142) PMID: [24863567](https://pubmed.ncbi.nlm.nih.gov/24863567/)
43. Serrao JE, Cruz-Landim C (1995) Gut structures in adult workers of necrophorous Neotropical stingless bees (Hymenoptera: Apidae: Meliponinae). *Entomol Gen* 19: 261–265.
44. Pauchet Y, Wilkinson P, Vogel H, Nelson DR, Reynolds SE, Heckel DG, et al. (2010) Pyrosequencing the *Manduca sexta* larval midgut transcriptome: messages for digestion, detoxification and defence. *Insect Molecular Biology* 19: 61–75. doi: [10.1111/j.1365-2583.2009.00936.x](https://doi.org/10.1111/j.1365-2583.2009.00936.x) PMID: [19909380](https://pubmed.ncbi.nlm.nih.gov/19909380/)
45. Wang YH, Gu ZY, Wang JM, Sun SS, Wang BB, Jin YQ, et al. (2013) Changes in the activity and the expression of detoxification enzymes in silkworms (*Bombyx mori*) after phoxim feeding. *Pesticide Biochemistry and Physiology* 105: 13–17. doi: [10.1016/j.pestbp.2012.11.001](https://doi.org/10.1016/j.pestbp.2012.11.001) PMID: [24238284](https://pubmed.ncbi.nlm.nih.gov/24238284/)
46. Harker JE (1999) The structure of the foregut and midgut of nymphs, subimagos and imagos of *Cloeon dipterum* (Ephemeroptera) and the functions of the gut of adult mayflies. *Journal of Zoology* 248: 243–253.
47. Ballan-Dufrançais C (2002) Localization of metals in cells of pterygote insects. *Microscopy Research and Technique* 56: 403–420. PMID: [11921343](https://pubmed.ncbi.nlm.nih.gov/11921343/)
48. Volland J-M, Lechaire J-P, Frebourg G, Aldana Aranda D, Ramdine G, Gros O (2012) Insight of EDX analysis and EFTEM: Are spherocrystals located in strombidae digestive gland implied in detoxification of trace metals? *Microscopy Research and Technique* 75: 425–432. doi: [10.1002/jemt.21073](https://doi.org/10.1002/jemt.21073) PMID: [21919125](https://pubmed.ncbi.nlm.nih.gov/21919125/)
49. de Almeida Rossi C, Roat TC, Tavares DA, Cintra-Socolowski P, Malaspina O (2013) Effects of sublethal doses of imidacloprid in malpighian tubules of africanized *Apis mellifera* (Hymenoptera, Apidae). *Microscopy Research and Technique* 76: 552–558. doi: [10.1002/jemt.22199](https://doi.org/10.1002/jemt.22199) PMID: [23483717](https://pubmed.ncbi.nlm.nih.gov/23483717/)
50. Rharrabe K, Bakrim A, Ghailani N, Sayah F (2007) Bioinsecticidal effect of harmaline on *Plodia interpunctella* development (Lepidoptera: Pyralidae). *Pesticide Biochemistry and Physiology* 89: 137–145.
51. Pinto LZ, Laure MAFB, Bitondi MMG, Hartfelder K, Simões ZLP (2003) Ventral nerve cord remodeling in a stingless bee (*Melipona quadrifasciata anthidioides*, Hymenoptera, Apidae) depends on ecdysteroid fluctuation and programmed cell death. *Int J Dev Biol* 47: 385–388. PMID: [12895033](https://pubmed.ncbi.nlm.nih.gov/12895033/)

52. Cristofolletti PT, Ribeiro AF, Terra WR (2001) Apocrine secretion of amylase and exocytosis of trypsin along the midgut of *Tenebrio molitor* larvae. *J Insect Physiol* 47: 143–155. PMID: [11064021](#)
53. Costa MS, Pinheiro DO, Serrao JE, Pereira MJ (2012) Morphological changes in the midgut of *Aedes aegypti* L. (Diptera: Culicidae) larvae following exposure to an *Annona coriacea* (Magnoliales: Annonaceae) extract. *Neotrop Entomol* 41: 311–314. doi: [10.1007/s13744-012-0050-z](#) PMID: [23950067](#)
54. Vishwanathreddy H, Bhat GG, Inamdar SR, Gudihal RK, Swamy BM (2014) *Sclerotium rolfsii* lectin exerts insecticidal activity on *Spodoptera litura* larvae by binding to membrane proteins of midgut epithelial cells and triggering caspase-3-dependent apoptosis. *Toxicol* 78: 47–57. doi: [10.1016/j.toxicol.2013.11.012](#) PMID: [24291632](#)
55. Zagariya AM (2012) A novel method for detection of apoptosis. *Experimental Cell Research* 318: 861–866. doi: [10.1016/j.yexcr.2012.02.001](#) PMID: [22348877](#)
56. Santos D, Azevedo D, Campos L, Zanuncio J, Serrão J (2014) *Melipona quadrifasciata* (Hymenoptera: Apidae) fat body persists through metamorphosis with a few apoptotic cells and an increased autophagy. *Protoplasma* 252: 619–627. doi: [10.1007/s00709-014-0707-z](#) PMID: [25269629](#)
57. Franzetti E, Huang Z-J, Shi Y-X, Xie K, Deng X-J, Li J-P, et al. (2012) Autophagy precedes apoptosis during the remodeling of silkworm larval midgut. *Apoptosis* 17: 305–324. doi: [10.1007/s10495-011-0675-0](#) PMID: [22127643](#)
58. Csoknya M, Halasy K (1977) Anatomy of the nervous system of mayfly larvae (*Palingenia longicauda* Oliv). *Acta Biologica Szeged* 23: 89–95.
59. Roma GC, Camargo Mathias MI, Nunes PH, Bechara GH (2014) Changes in the synganglion of *Rhipicephalus sanguineus* (Latreille, 1806) (Acari: Ixodidae) female ticks exposed to permethrin: An ultrastructural overview. *Acta Tropica* 136: 19–26. doi: [10.1016/j.actatropica.2014.04.004](#) PMID: [24742902](#)
60. Roma GC, Camargo-Mathias MI, de Oliveira PR, Furquim KCS, Bechara GH (2013) Neurotoxic action of permethrin in *Rhipicephalus sanguineus* (Latreille, 1806) (Acari: Ixodidae) female ticks. Morphological and cytochemical evaluation of the central nervous system. *Veterinary Parasitology* 196: 482–491. doi: [10.1016/j.vetpar.2013.02.025](#) PMID: [23578999](#)
61. Chapman RF (1998) *The Insects, Structure and Function*. Cambridge: Cambridge University Press.
62. Clark JM, Symington S (2012) Advances in the mode of action of pyrethroids. In: Matsuo N, Mori T, editors. *Pyrethroids*: Springer Berlin Heidelberg. pp. 49–72.
63. Casida JE, Durkin KA (2013) Neuroactive insecticides: Targets, selectivity, resistance, and secondary effects. *Annual Review of Entomology* 58: 99–117. doi: [10.1146/annurev-ento-120811-153645](#) PMID: [23317040](#)
64. King DG, Davies IM (1987) Laboratory and field studies of the accumulation of inorganic mercury by the mussel *Mytilus edulis* (L.). *Marine Pollution Bulletin* 18: 40–45.
65. Huang J-H, Jing X, Douglas AE (2015) The multi-tasking gut epithelium of insects. *Insect Biochemistry and Molecular Biology*: (no prelo).
66. Levy SM, Falleiros AMF, Gregório EA, Arrebola NR, Toledo LA (2004) The larval midgut of *Anticarsia gemmatalis* (Hübner) (Lepidoptera: Noctuidae): light and electron microscopy studies of the epithelial cells. *Brazilian Journal of Biology*.
67. Rasmussen JJ (2012) *Pesticide effects on the structure and function of stream ecosystems*. Aarhus: Aarhus University.
68. Mohr S, Berghahn R, Schmiediche R, Hubner V, Loth S, et al. (2012) Macroinvertebrate community response to repeated short-term pulses of the insecticide imidacloprid. *Aquat Toxicol* 110–111: 25–36.
69. Unkiewicz-Winiarczyk A, Gromysz-Kalkowska K (2012) Effect of temperature on toxicity of deltamethrin and oxygen consumption by *Porcellio scaber* Latr (Isopoda). *Bulletin of Environmental Contamination and Toxicology* 89: 960–965. doi: [10.1007/s00128-012-0814-5](#) PMID: [22983688](#)
